# Supplementary material
Source: PubMed Central journal article supplement (PMC5237380)

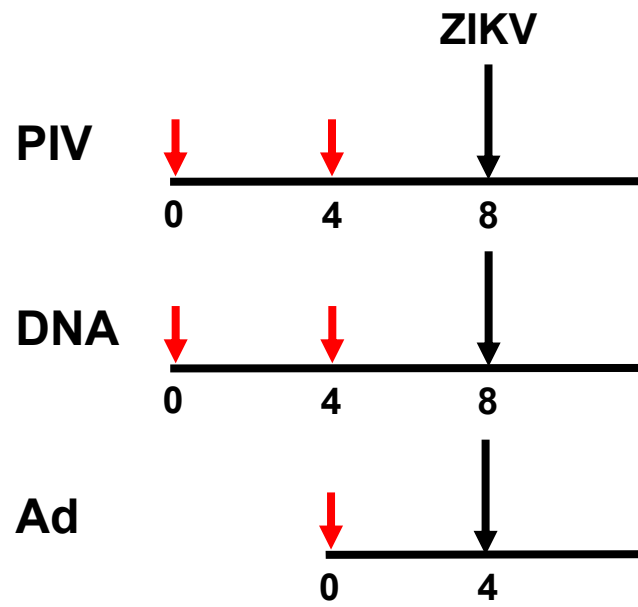

Figure S1

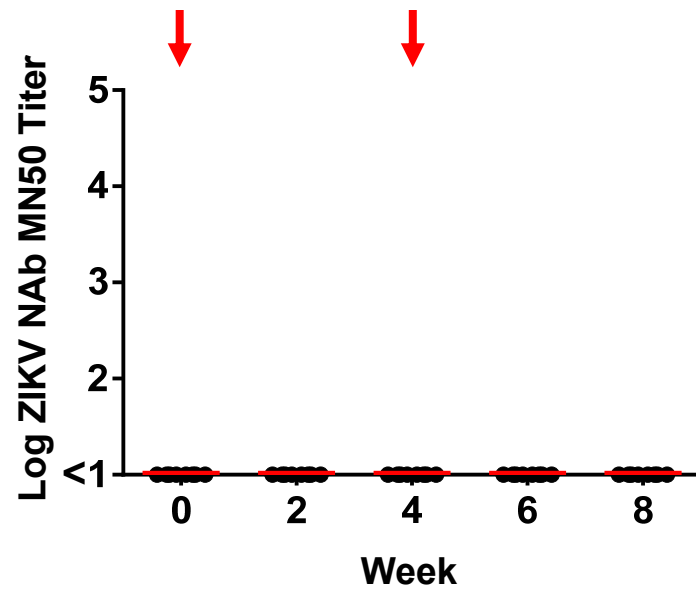

Figure S2

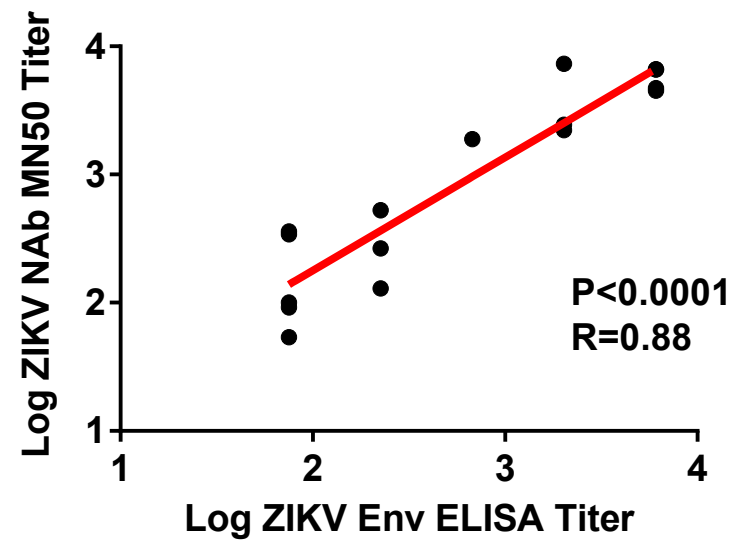

Figure S3

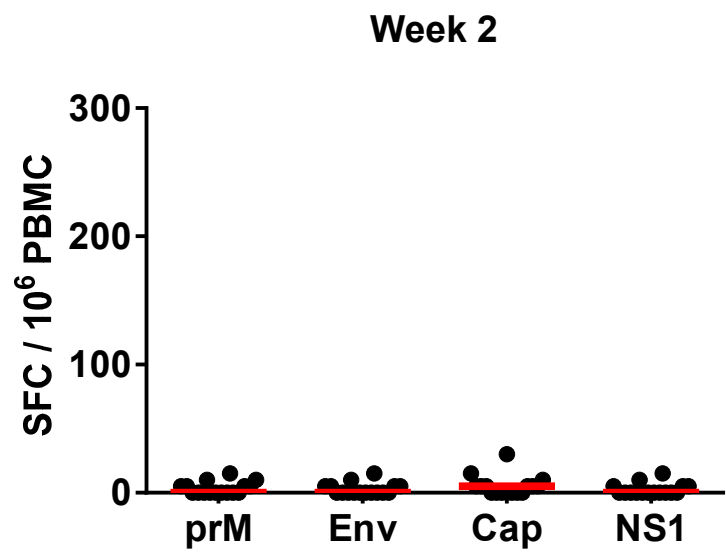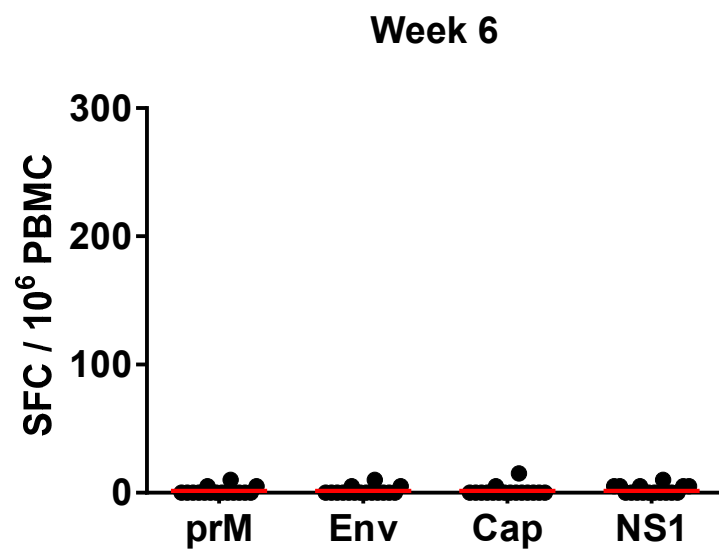

**Figure S4**



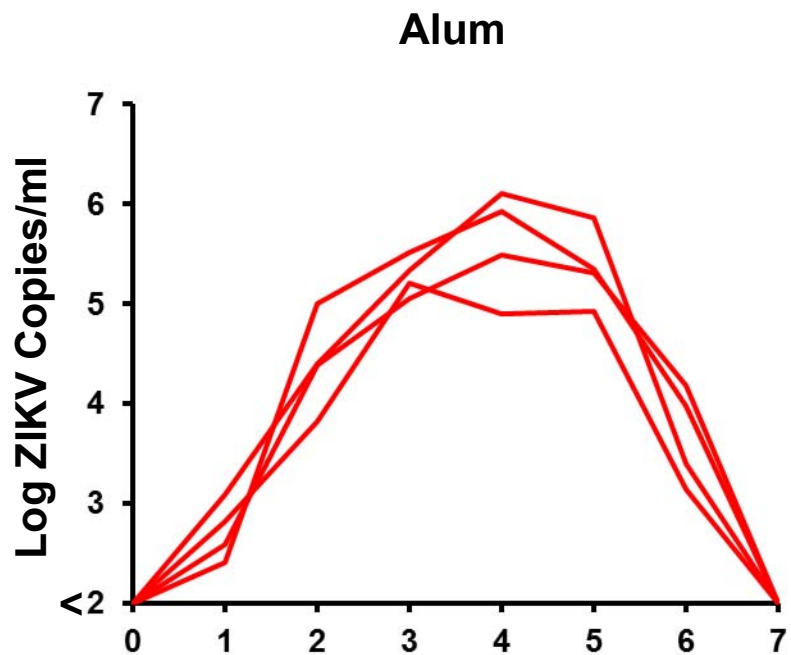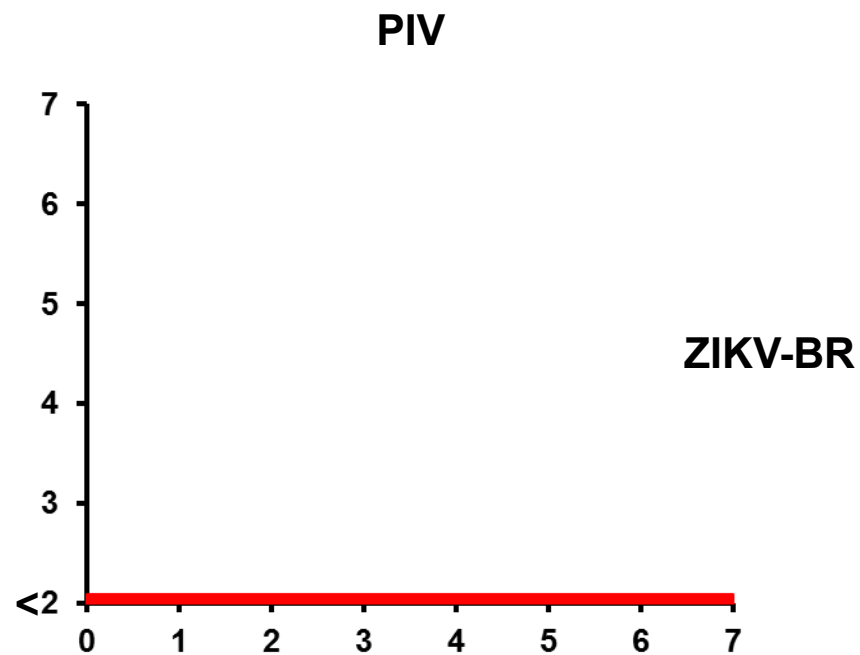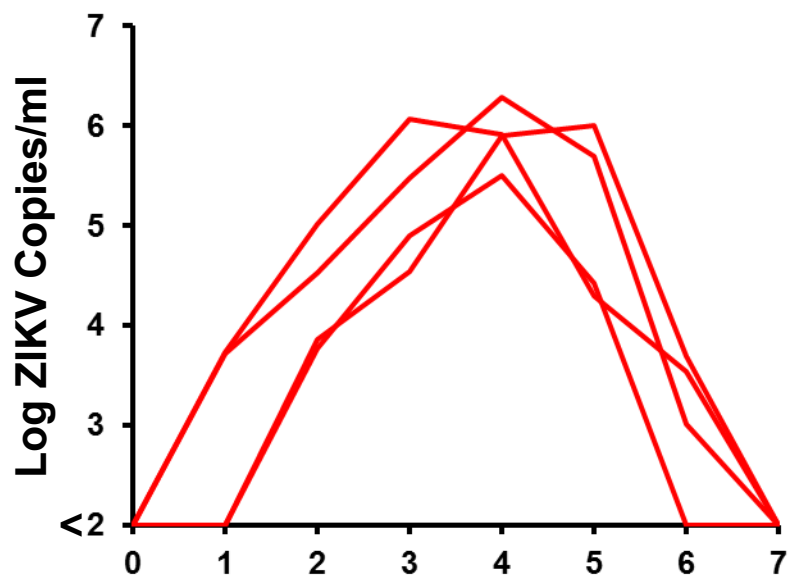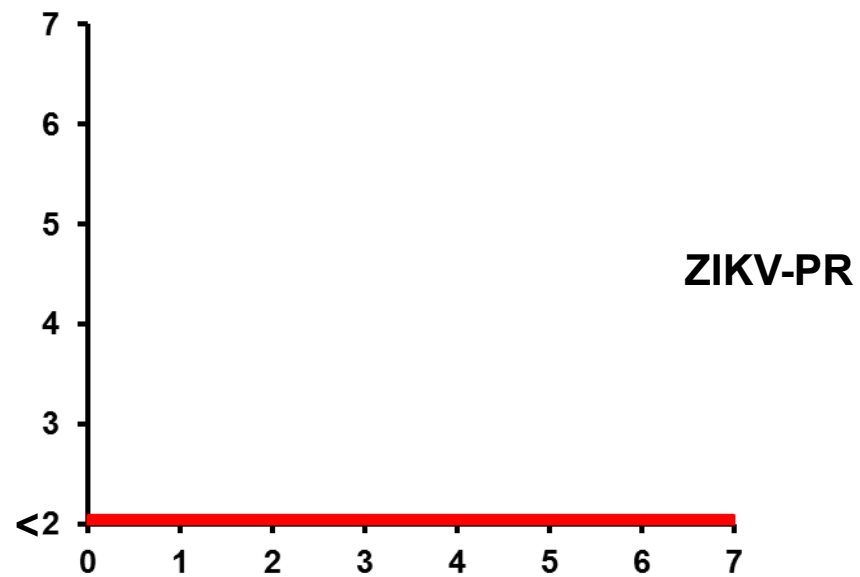

Days Following Challenge

Figure S6

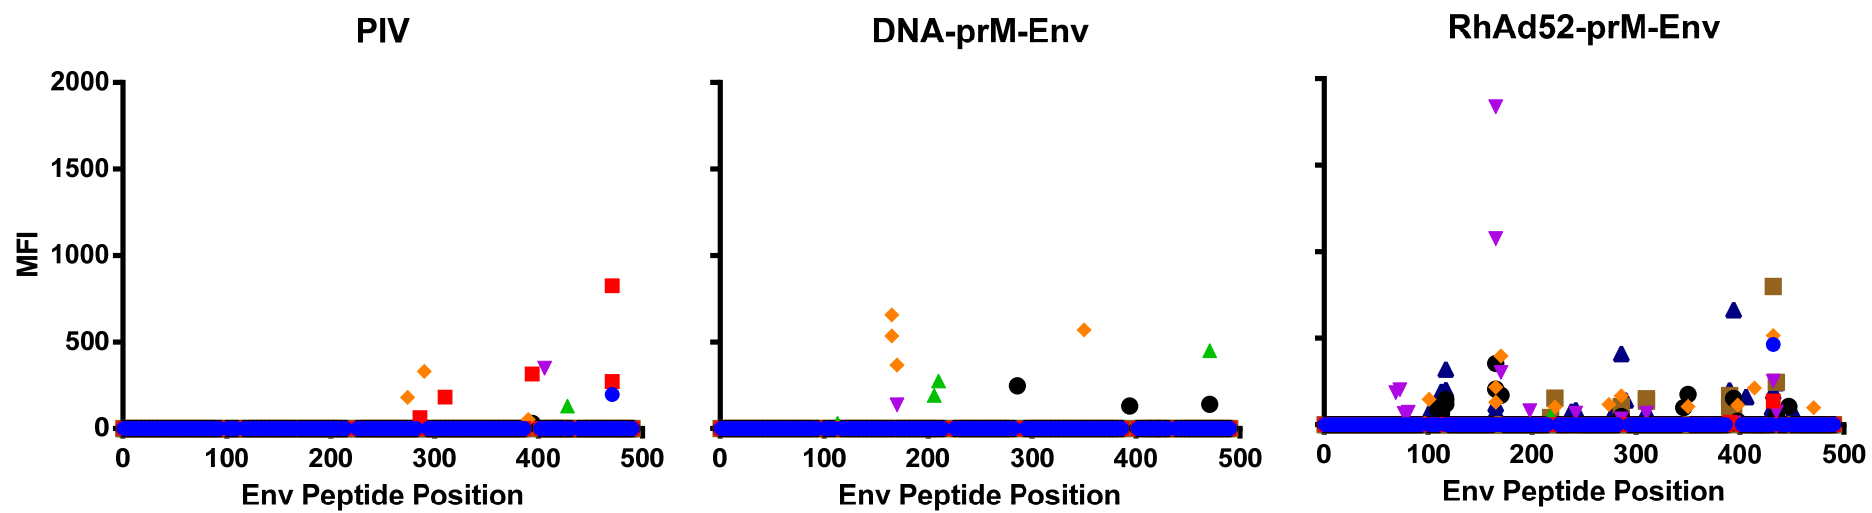

Figure S7

Supplement: NIHMS841026-supplement-Supplemental_Figures.pdf [file NIHMS841026-supplement-Supplemental_Figures.pdf]
